# Supplementary material for: Development of an AQbD-guided sustainable RP-HPLC method for simultaneous quantification of saracatinib and rapamycin in lipid–polymer hybrid nanocarriers
Source: Royal Society of Chemistry journal article supplement (doi:10.1039/d6ra01901c), 2026-05-18
Supplement: d6ra01901c1.pdf [file d6ra01901c1.pdf]

## Supplementary Data

### Development of an AQbD-Guided Sustainable RP-HPLC Method for Simultaneous Quantification of Saracatinib and Rapamycin in Lipid–Polymer Hybrid Nanocarriers

Mohit Angolkar<sup>1</sup>, Sharanya Paramshetti<sup>1</sup>, Darshan Patil<sup>1</sup>, Asha Spandana K M<sup>1\*</sup>, Riyaz Ali M. Osmani<sup>2</sup>, H. V. Gangadharappa<sup>1</sup>, Adel Al Fatease<sup>2</sup>, Ali H. Alamri<sup>2</sup>, Umme Hani<sup>2</sup>

<sup>1</sup> Department of Pharmaceutics, JSS College of Pharmacy, JSS Academy of Higher Education and Research (JSSAHER), Mysuru-570015, Karnataka, India; [mohitangolkar@jssuni.edu.in](mailto:mohitangolkar@jssuni.edu.in) (M.A.), [paramshettisharanya@gmail.com](mailto:paramshettisharanya@gmail.com) (S.P.), [darshanpatilph@gmail.com](mailto:darshanpatilph@gmail.com) (D.P.), [asha@jssuni.edu.in](mailto:asha@jssuni.edu.in) (A.S.K.M.), [hvgangadharappa@jssuni.edu.in](mailto:hvgangadharappa@jssuni.edu.in) (H.V.G.)

<sup>2</sup> Department of Pharmaceutics, College of Pharmacy, King Khalid University (KKU), Abha 62223, Saudi Arabia; [riyazosmani@gmail.com](mailto:riyazosmani@gmail.com) (R.A.M.O.), [afatease@kku.edu.sa](mailto:afatease@kku.edu.sa) (A.A.F), [aamri@kku.edu.sa](mailto:aamri@kku.edu.sa) (A.H.A.), [uahmed@kku.edu.sa](mailto:uahmed@kku.edu.sa) (U.H.)

#### \*Corresponding Author:

Prof. Asha Spandana K. M.,  
Department of Pharmaceutics,  
JSS College of Pharmacy, JSSAHER,  
Mysuru-570015, Karnataka, India  
Email: [asha@jssuni.edu.in](mailto:asha@jssuni.edu.in)

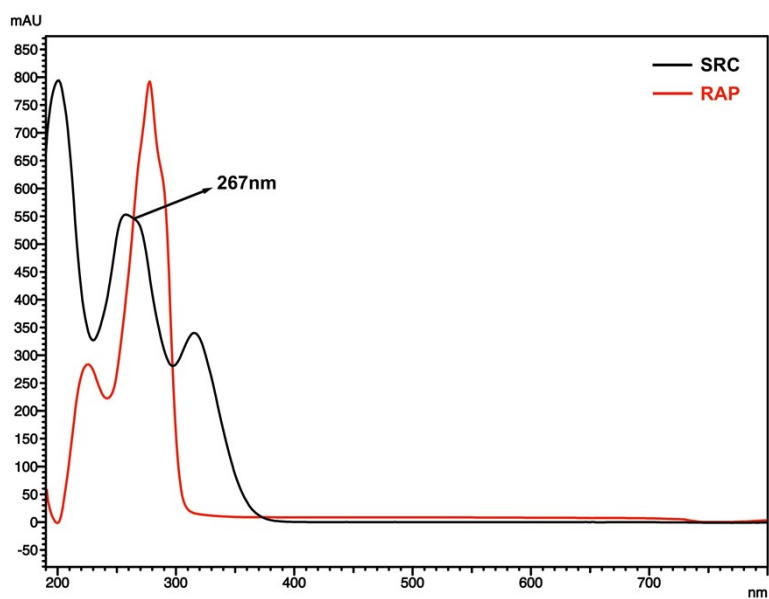

**Figure S1.** Illustration of the isobestic point in the UV absorption spectra of SRC (black line) and RAP (red line).

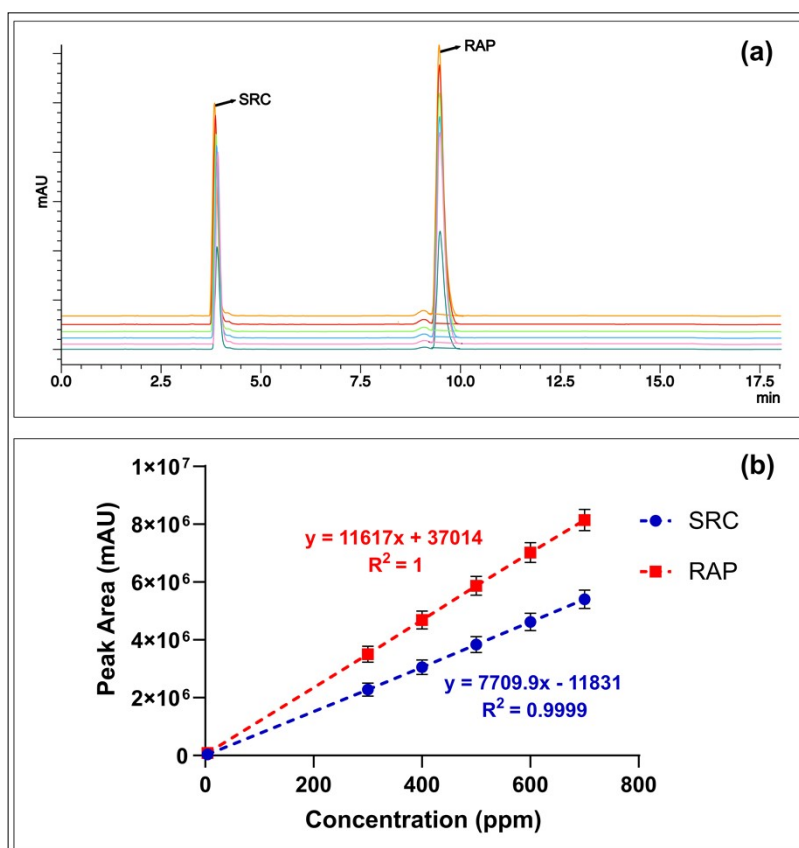

**Figure S2.** Linearity of SRC and RAP; (a) chromatograms of various concentrations ranging from the LOD to 140% of the desired concentration (i.e. 500  $\mu\text{g}/\text{mL}$ ) for both drugs, and (b) standard calibration curve for both SRC and RAP with their respective regression equations. The findings are depicted as mean  $\pm$  SD,  $n = 3$ .

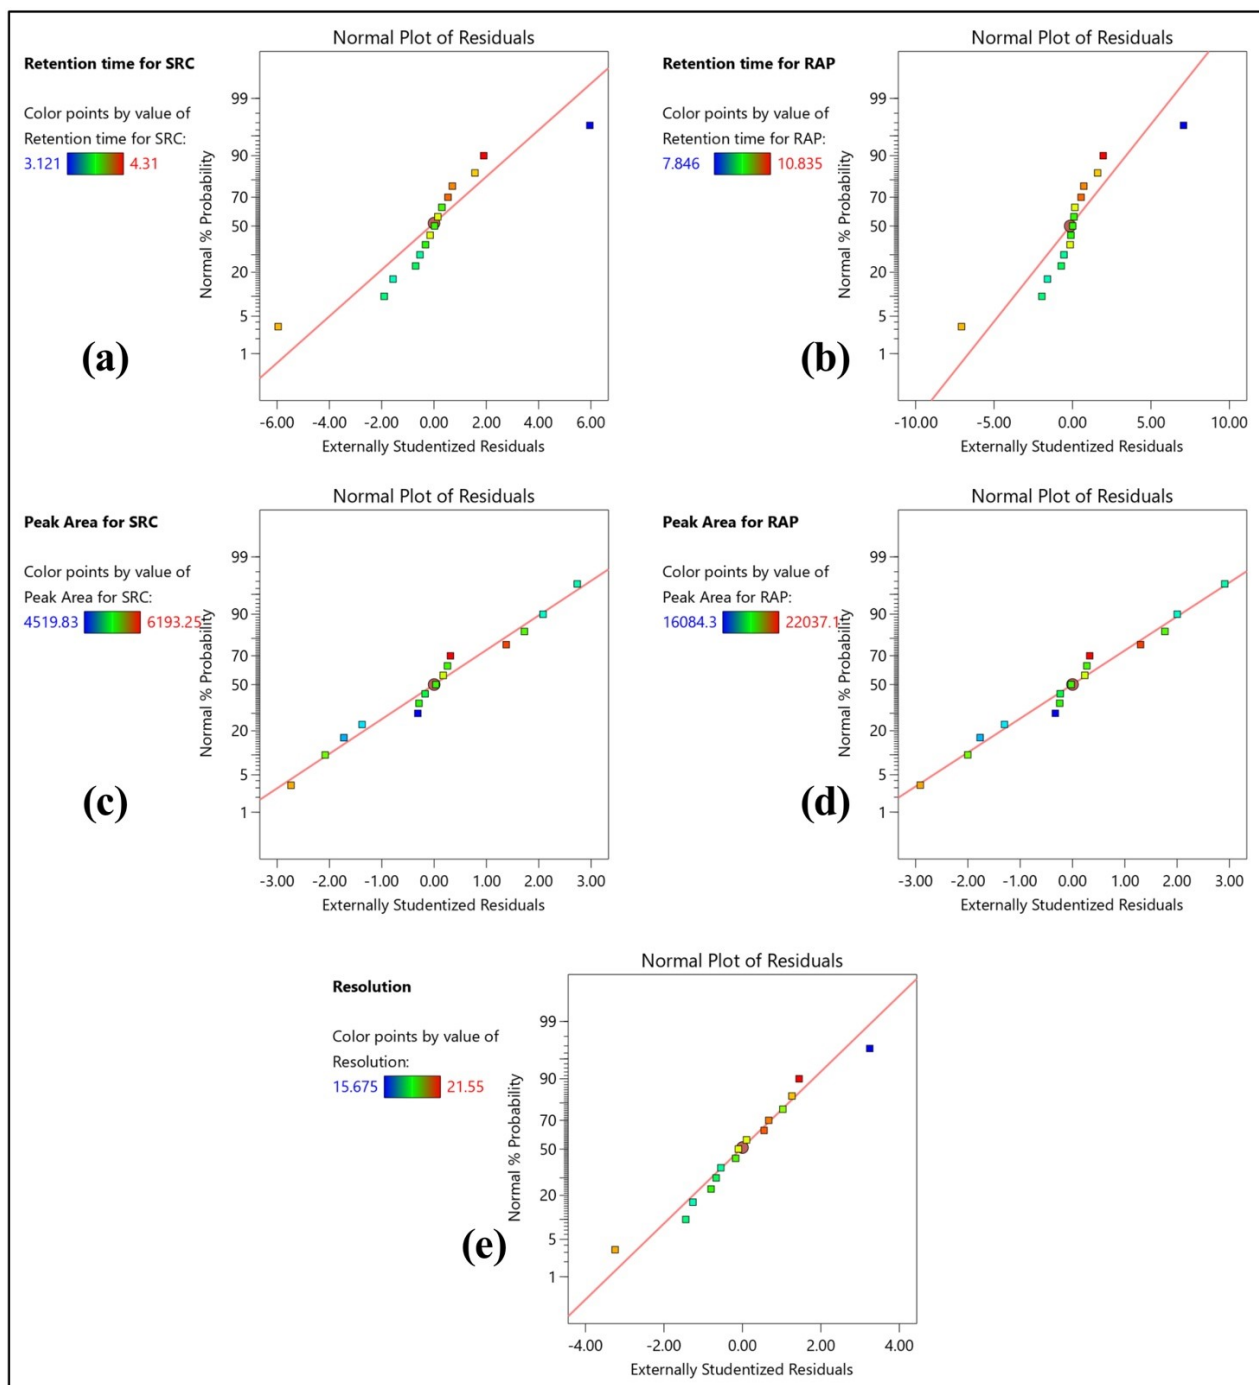

**Figure S3.** Normal plots of residuals for the responses (a) SRC retention time; (b) RAP retention time; (c) SRC peak area; (d) RAP peak area; and (e) resolution.

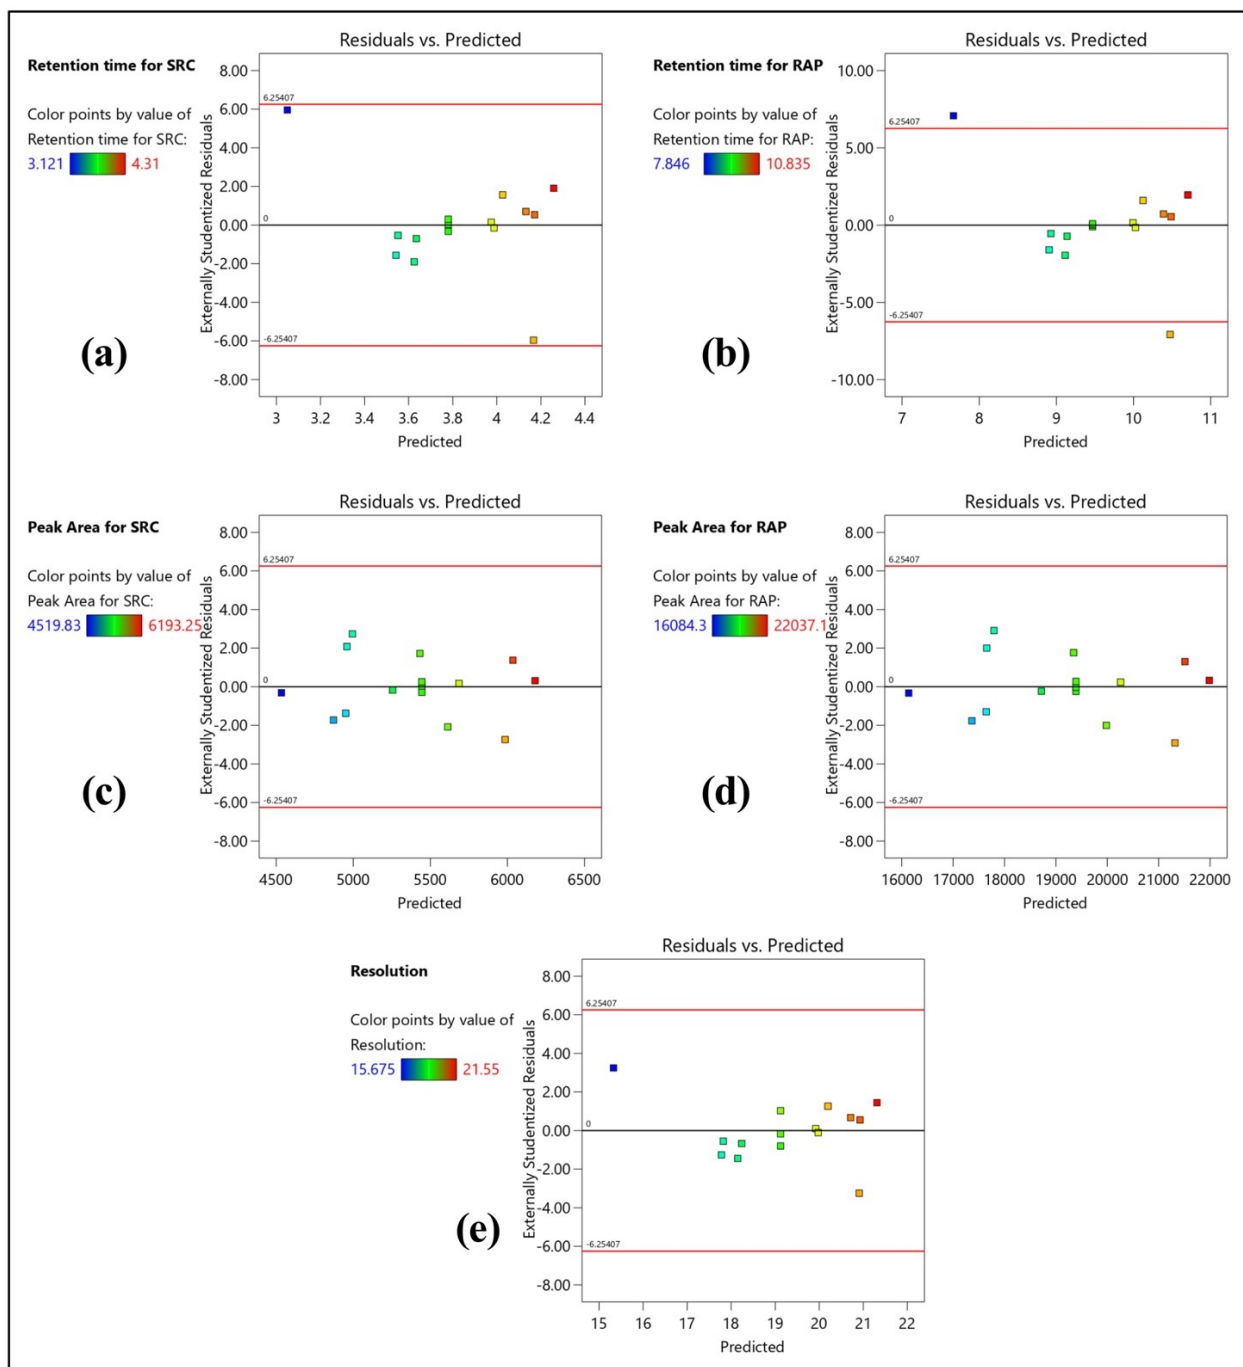

**Figure S4.** Residual vs Predicted plots for the responses (a) SRC retention time; (b) RAP retention time; (c) SRC peak area; (d) RAP peak area; and (e) resolution.

**Table S1.** BBD variables for Chromatographic factors and their level.

| Factors                          | Used level, actual (coded) |        |      |
|----------------------------------|----------------------------|--------|------|
|                                  | Low                        | Medium | High |
|                                  | (-1)                       | (0)    | (+1) |
| <b>Independent variables</b>     |                            |        |      |
| Mobile phase conc. (% v/v) [A]   | 10                         | 20     | 30   |
| Flow rate (mL/min) [B]           | 0.8                        | 1.0    | 1.2  |
| Injection volume ( $\mu$ L) [C]  | 5                          | 10     | 15   |
| <b>Dependent responses</b>       |                            |        |      |
| Retention time of SRC (min) [R1] | Minimize                   |        |      |
| Retention time of RAP (min) [R2] | Minimize                   |        |      |
| Peak area of SRC (AU) [R3]       | Maximize                   |        |      |
| Peak area of RAP (AU) [R4]       | Maximize                   |        |      |
| Resolution [R5]                  | Maximize                   |        |      |

**Table S2.** Risk assessment for critical method parameters vs HPLC method responses

| Input variables<br>(A <sub>n</sub> ) | Responses (R <sub>n</sub> )                 |                            |            | Consideration |
|--------------------------------------|---------------------------------------------|----------------------------|------------|---------------|
|                                      | Retention time<br>of APIs (t <sub>R</sub> ) | Peak Area of APIs<br>(mAU) | Resolution |               |
| Mobile Phase<br>concentration        | +1                                          | +1                         | +1         | Optimized     |
| Flow rate                            | +1                                          | +1                         | +1         | Optimized     |
| Injection volume                     | 0                                           | +1                         | 0          | Optimized     |

|                         |    |    |    |            |
|-------------------------|----|----|----|------------|
| <b>Column type</b>      | +1 | +1 | +1 | Default    |
| <b>Column</b>           | 0  | 0  | 0  | Controlled |
| <b>Temperature</b>      |    |    |    |            |
| <b>Column length</b>    | 0  | 0  | 0  | Default    |
| <b>Detector</b>         | NA | NA | NA | Default    |
| <b>Reagents quality</b> | -1 | -1 | -1 | Controlled |

+1 highly considerable; 0 medium considerable; -1 low considerable

**Table S3.** Regression terms for responses of BBD

| <b>Responses</b> | <b>R<sup>2</sup> value</b> | <b>Predicted R<sup>2</sup></b> | <b>Adjusted R<sup>2</sup></b> |
|------------------|----------------------------|--------------------------------|-------------------------------|
| R1               | 0.9845                     | 0.7589                         | 0.9566                        |
| R2               | 0.9850                     | 0.7600                         | 0.9579                        |
| R3               | 0.9895                     | 0.8359                         | 0.9707                        |
| R4               | 0.9898                     | 0.8397                         | 0.9714                        |
| R5               | 0.9817                     | 0.7669                         | 0.9488                        |

**Table S4.** Desirability function parameters for optimization

| <b>Response</b> | <b>Goal</b> | <b>Lower Limit</b> | <b>Upper Limit</b> | <b>Importance</b> |
|-----------------|-------------|--------------------|--------------------|-------------------|
| <b>R1</b>       | Minimize    | 3.12               | 4.31               | Equal             |
| <b>R2</b>       | Minimize    | 7.84               | 10.83              | Equal             |
| <b>R3</b>       | Maximize    | 4519               | 6193               | Equal             |
| <b>R4</b>       | Maximize    | 16084              | 22037              | Equal             |
| <b>R5</b>       | Maximize    | 15.7               | 21.6               | Equal             |

**Table S5.** Robustness data of various factors

| <b>Factors</b>                                               | <b>Retention time<br/>(min)*</b> | <b>%<br/>RSD</b> | <b>Peak Area*</b>                               | <b>% RSD</b> |
|--------------------------------------------------------------|----------------------------------|------------------|-------------------------------------------------|--------------|
| <b>Saracatinib</b>                                           |                                  |                  |                                                 |              |
| <b>A: Flow rate (mL/min)</b>                                 |                                  |                  |                                                 |              |
| 0.9                                                          | 3.85 ± 0.03                      | 0.8              | 3.86 × 10 <sup>6</sup> ± 2.1 × 10 <sup>3</sup>  | 0.1          |
| 1.0                                                          | 3.91 ± 0.02                      | 0.5              | 3.85 × 10 <sup>6</sup> ± 3.4 × 10 <sup>3</sup>  | 0.1          |
| 1.1                                                          | 3.85 ± 0.02                      | 0.5              | 3.87 × 10 <sup>6</sup> ± 2.8 × 10 <sup>3</sup>  | 0.1          |
| <b>B: Fluoric acid concentration in mobile phase (% w/v)</b> |                                  |                  |                                                 |              |
| 0.09                                                         | 3.85 ± 0.04                      | 1.0              | 3.86 × 10 <sup>6</sup> ± 4.9 × 10 <sup>3</sup>  | 0.1          |
| 0.10                                                         | 3.89 ± 0.07                      | 1.8              | 3.84 × 10 <sup>6</sup> ± 15.9 × 10 <sup>3</sup> | 0.4          |
| 0.11                                                         | 3.85 ± 0.05                      | 1.3              | 3.87 × 10 <sup>6</sup> ± 4.1 × 10 <sup>3</sup>  | 0.1          |
| <b>C: Column Temperature (°C)</b>                            |                                  |                  |                                                 |              |
| 23                                                           | 3.85 ± 0.03                      | 0.8              | 3.87 × 10 <sup>6</sup> ± 16.5 × 10 <sup>3</sup> | 0.4          |
| 25                                                           | 3.90 ± 0.06                      | 1.5              | 3.83 × 10 <sup>6</sup> ± 2.6 × 10 <sup>3</sup>  | 0.1          |
| 27                                                           | 3.84 ± 0.04                      | 1.0              | 3.88 × 10 <sup>6</sup> ± 28.5 × 10 <sup>3</sup> | 0.7          |
| <b>Rapamycin</b>                                             |                                  |                  |                                                 |              |
| <b>A: Flow rate (mL/min)</b>                                 |                                  |                  |                                                 |              |
| 0.9                                                          | 9.46 ± 0.03                      | 0.3              | 5.86 × 10 <sup>6</sup> ± 12.3 × 10 <sup>3</sup> | 0.2          |
| 1.0                                                          | 9.48 ± 0.02                      | 0.2              | 5.96 × 10 <sup>6</sup> ± 5.4 × 10 <sup>3</sup>  | 0.1          |

|                                                              |             |     |                                                 |     |
|--------------------------------------------------------------|-------------|-----|-------------------------------------------------|-----|
| 1.1                                                          | 9.47 ± 0.01 | 0.1 | 5.87 × 10 <sup>6</sup> ± 17.3 × 10 <sup>3</sup> | 0.3 |
| <b>B: Fluoric acid concentration in mobile phase (% w/v)</b> |             |     |                                                 |     |
| 0.09                                                         | 9.47 ± 0.04 | 0.4 | 5.87 × 10 <sup>6</sup> ± 16.8 × 10 <sup>3</sup> | 0.3 |
| 0.10                                                         | 9.48 ± 0.02 | 0.2 | 5.94 × 10 <sup>6</sup> ± 23.5 × 10 <sup>3</sup> | 0.4 |
| 0.11                                                         | 9.47 ± 0.03 | 0.3 | 5.83 × 10 <sup>6</sup> ± 15.3 × 10 <sup>3</sup> | 0.3 |
| <b>C: Column Temperature (°C)</b>                            |             |     |                                                 |     |
| 23                                                           | 9.47 ± 0.05 | 0.5 | 5.88 × 10 <sup>6</sup> ± 19.6 × 10 <sup>3</sup> | 0.3 |
| 25                                                           | 9.47 ± 0.02 | 0.2 | 5.90 × 10 <sup>6</sup> ± 7.3 × 10 <sup>3</sup>  | 0.1 |
| 27                                                           | 9.48 ± 0.01 | 0.1 | 5.87 × 10 <sup>6</sup> ± 48.1 × 10 <sup>3</sup> | 0.8 |

\*The findings are depicted as mean ± SD; n = 3.
